# Supplementary material
Source: PubMed Central journal article supplement (PMC11589888)
Supplement: NIHMS2026441-supplement-SI_Figures.pdf [file NIHMS2026441-supplement-SI_Figures.pdf]

Benzo[a]pyrene-Induced Multigenerational Changes in Gene Expression, Behavior, and DNA  
Methylation are Primarily Influenced by Paternal Exposure

Z. Pandelides<sup>1</sup>, M. C. Sturgis<sup>1</sup>, C. Thornton<sup>1</sup>, N. Aluru<sup>2</sup>, K.L. Willett<sup>1\*</sup>

<sup>1</sup>Department of BioMolecular Sciences, School of Pharmacy, University of Mississippi, University, Mississippi 38677.

<sup>2</sup>Biology Department, Woods Hole Oceanographic Institution and Woods Hole Center for Oceans and Human Health, Woods Hole, Massachusetts 02543.

\*To whom correspondence should be addressed at Division of Environmental Toxicology, Department of BioMolecular Sciences, School of Pharmacy, The University of Mississippi, 303A Faser Hall, Box 1848, MS 38677. Phone: (662) 915-6691. E-mail: kwillett@olemiss.edu.

Running head: Paternal exposure to BaP causes multigenerational adverse impacts

Table S1: Adult zebrafish length (mm), wet weight (g), liver somatic index (LSI), gonad somatic index (GSI) displayed as mean  $\pm$  standard error, n = 10 fish per sex. \*Indicates a significant difference in F0 fish between controls and BaP treatment (t-test, p = 0.002). There were no significant differences in F1 fish (One-way ANOVA, p > 0.05).

| Gen | Treatment | Sex | Length (mm)     | Wet Weight (g)   | LSI             | GSI                                |
|-----|-----------|-----|-----------------|------------------|-----------------|------------------------------------|
| F0  | Control   | M   | 31.9 $\pm$ 0.57 | 0.27 $\pm$ 0.011 | 0.95 $\pm$ 0.14 | 1.11 $\pm$ 0.09                    |
| F0  | BaP       | M   | 32.8 $\pm$ 0.44 | 0.28 $\pm$ 0.011 | 0.68 $\pm$ 0.07 | <b>0.68 <math>\pm</math> 0.08*</b> |
| F0  | Control   | F   | 32.1 $\pm$ 0.35 | 0.30 $\pm$ 0.010 | 2.82 $\pm$ 0.14 | 5.42 $\pm$ 0.42                    |
| F0  | BaP       | F   | 33.7 $\pm$ 0.42 | 0.31 $\pm$ 0.009 | 2.52 $\pm$ 0.14 | 5.67 $\pm$ 0.43                    |
| F1  | Control   | M   | 36.3 $\pm$ 0.46 | 0.42 $\pm$ 0.029 | 0.73 $\pm$ 0.06 | 0.71 $\pm$ 0.19                    |
| F1  | Cm x Bf   | M   | 35.5 $\pm$ 0.96 | 0.38 $\pm$ 0.025 | 0.59 $\pm$ 0.09 | 0.75 $\pm$ 0.10                    |
| F1  | Bm x Cf   | M   | 35.4 $\pm$ 0.19 | 0.36 $\pm$ 0.014 | 0.65 $\pm$ 0.09 | 0.75 $\pm$ 0.06                    |
| F1  | BaP       | M   | 34.8 $\pm$ 0.66 | 0.37 $\pm$ 0.020 | 0.64 $\pm$ 0.05 | 0.71 $\pm$ 0.09                    |
| F1  | Control   | F   | 37.1 $\pm$ 0.84 | 0.45 $\pm$ 0.038 | 2.54 $\pm$ 0.19 | 4.92 $\pm$ 0.48                    |
| F1  | Cm x Bf   | F   | 37.5 $\pm$ 0.42 | 0.45 $\pm$ 0.017 | 2.13 $\pm$ 0.09 | 4.32 $\pm$ 0.33                    |
| F1  | Bm x Cf   | F   | 36.7 $\pm$ 0.60 | 0.43 $\pm$ 0.014 | 2.46 $\pm$ 0.11 | 4.54 $\pm$ 0.31                    |
| F1  | BaP       | F   | 37.5 $\pm$ 0.55 | 0.51 $\pm$ 0.052 | 2.55 $\pm$ 0.28 | 4.79 $\pm$ 0.56                    |

Table S2: Adult zebrafish fecundity displayed as mean  $\pm$  standard error, n = 5 breeding groups per treatment. Eggs were collected on two consecutive days from 5 tanks (2 males and 2 females per tank). There were no significant differences in F0 or F1 fish (One-way ANOVA, p > 0.05).

| Gen | Treatment | Avg # Eggs / week | % Survival (24 hpf) | % Hatch (96 hpf) | % Survival (96 hpf) |
|-----|-----------|-------------------|---------------------|------------------|---------------------|
| F0  | Control   | 191.0 $\pm$ 17.2  | 88.5 $\pm$ 5.0      | 100 $\pm$ 0      | 88.5 $\pm$ 5.0      |
| F0  | Cm x Bf   | 203.4 $\pm$ 20.6  | 77.5 $\pm$ 13.5     | 99.5 $\pm$ 0.5   | 77.0 $\pm$ 13.4     |
| F0  | Bm x Cf   | 169.6 $\pm$ 27.4  | 91.3 $\pm$ 1.2      | 100 $\pm$ 0      | 88.2 $\pm$ 2.8      |
| F0  | BaP       | 286.6 $\pm$ 48.4  | 75.0 $\pm$ 15.4     | 99.5 $\pm$ 0.5   | 75.0 $\pm$ 15.4     |
| F1  | Control   | 171.6 $\pm$ 20.8  | 97.5 $\pm$ 0.8      | 100 $\pm$ 0      | 95.9 $\pm$ 2.0      |
| F1  | Cm x Bf   | 218.8 $\pm$ 27.8  | 94.0 $\pm$ 2.3      | 100 $\pm$ 0      | 94.0 $\pm$ 2.3      |
| F1  | Bm x Cf   | 167.4 $\pm$ 24.3  | 93.8 $\pm$ 5.4      | 100 $\pm$ 0      | 93.8 $\pm$ 5.4      |
| F1  | BaP       | 277.0 $\pm$ 55.4  | 99.0 $\pm$ 1        | 100 $\pm$ 0      | 99 $\pm$ 1.0        |

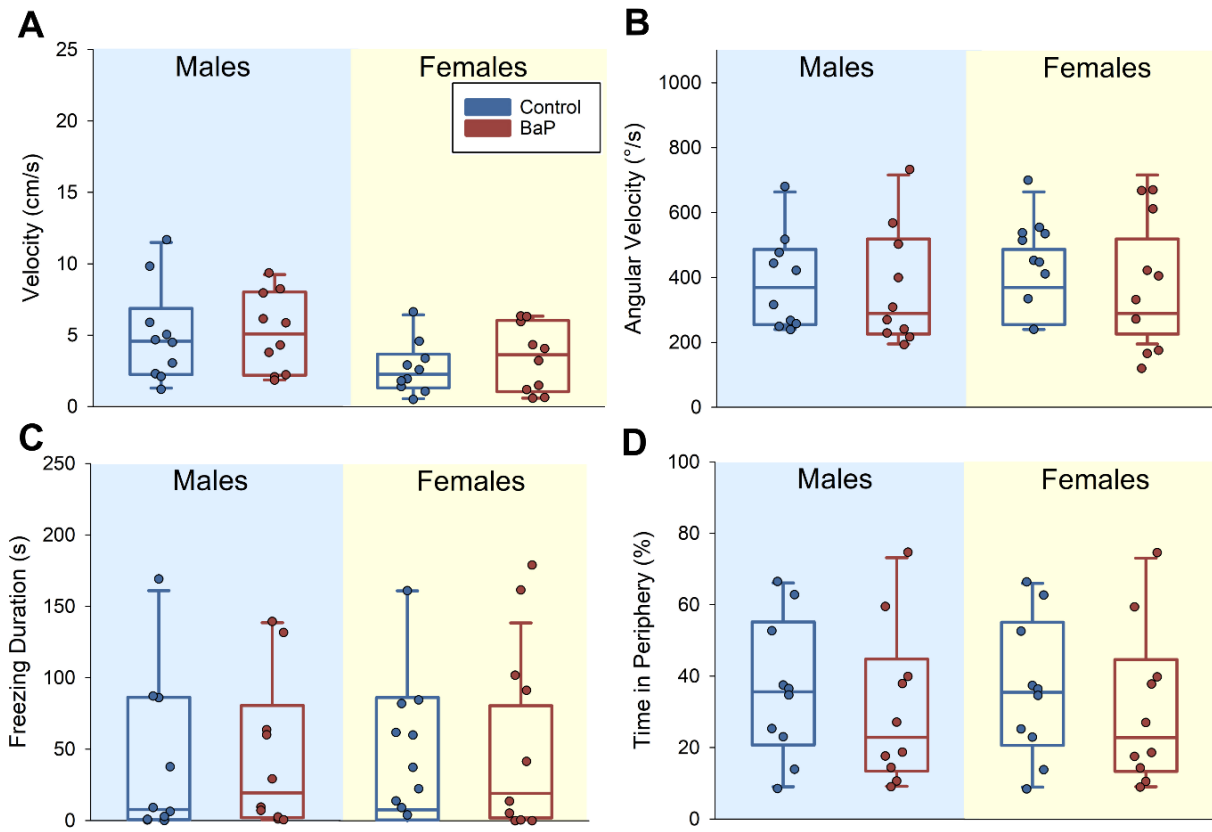

Figure S1: Adult F0 open field behavior,  $n = 10$  fish per sex. There were no significant differences between control and exposed fish (t-test,  $p > 0.05$ ).

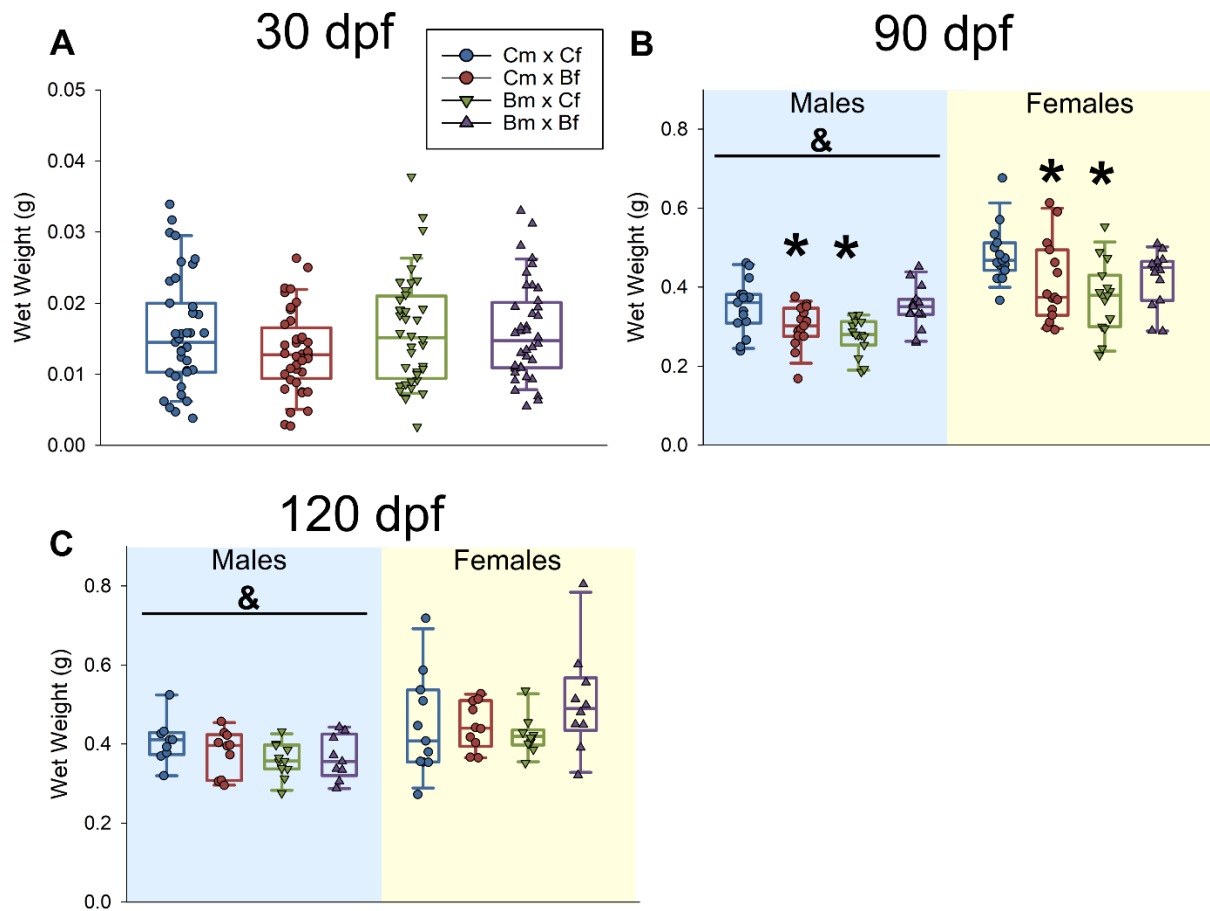

Figure S2: Wet weight of F1 zebrafish produced by parents exposed to BaP measured at 30 dpf (n=40), 90 dpf (n=15/sex), 120 dpf (n=10/sex). Letters that are not in common are significantly different (ANOVA, SNK post-hoc  $p \leq 0.05$ ), \*Indicates a significant difference from the control cross, & indicates a significant difference between males and females (two-way-ANOVA, SNK post-hoc  $p \leq 0.05$ ).

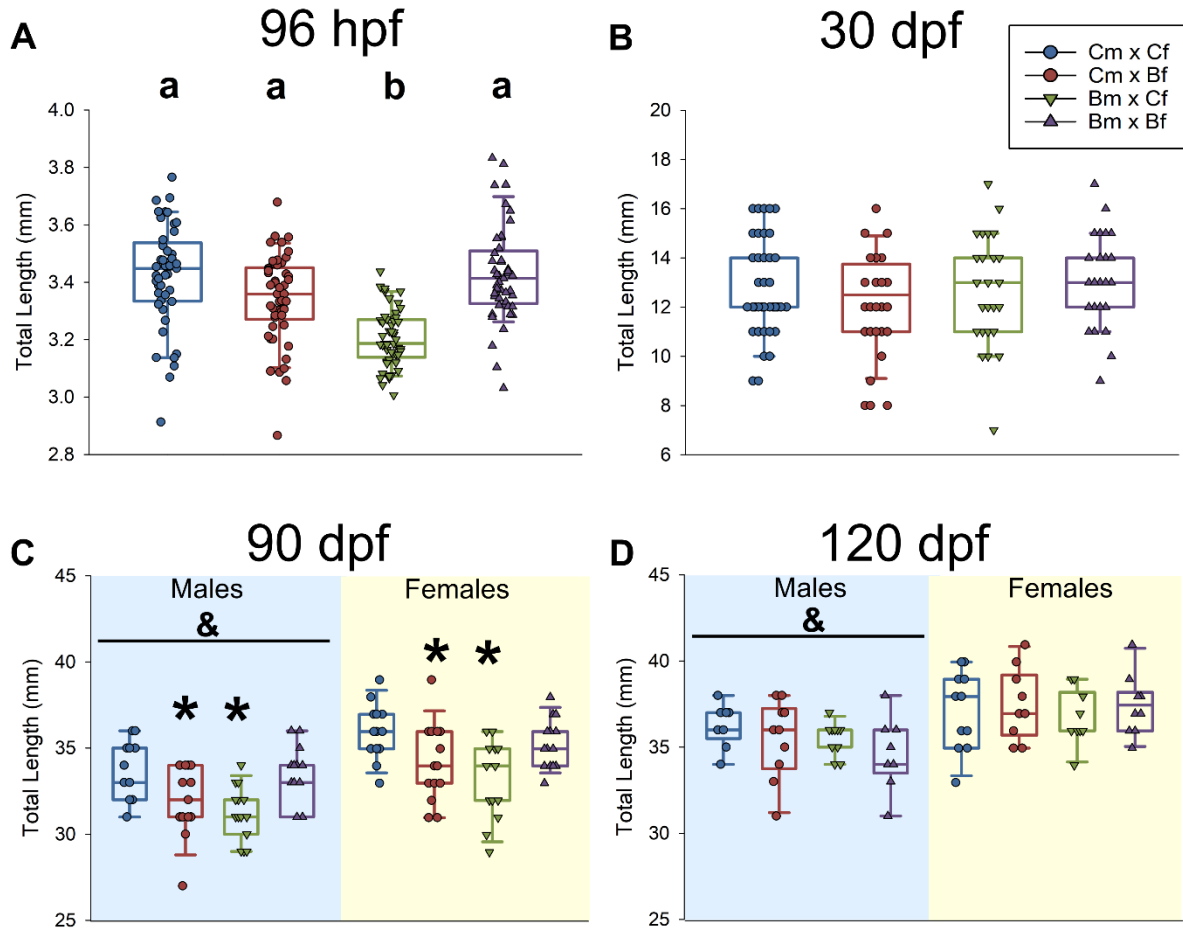

Figure S3: Total length of F1 zebrafish produced by parents exposed to BaP measured at 96 hpf (n=48), 30 dpf (n=40), 90 dpf (n=15/sex), 120 dpf (n=10/sex). Letters that are not in common are significantly different (ANOVA, SNK post-hoc  $p \leq 0.05$ ), \*Indicates a significant difference from the control cross, & indicates a significant difference between males and females (two-way-ANOVA, SNK post-hoc  $p \leq 0.05$ ).

### A F2 Larval Photomotor Response

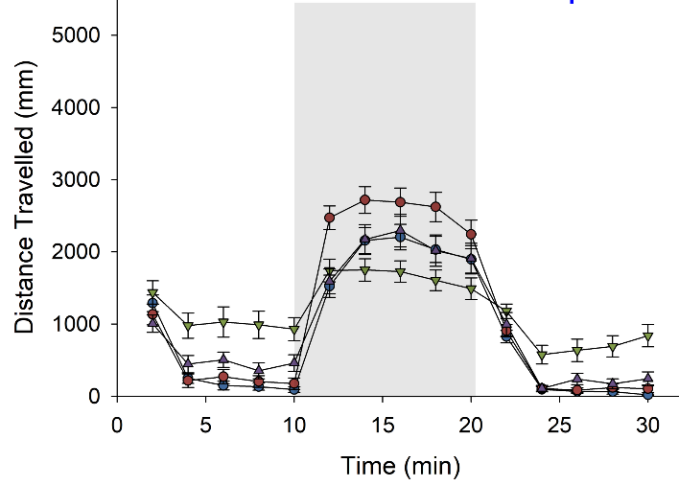

### B F2

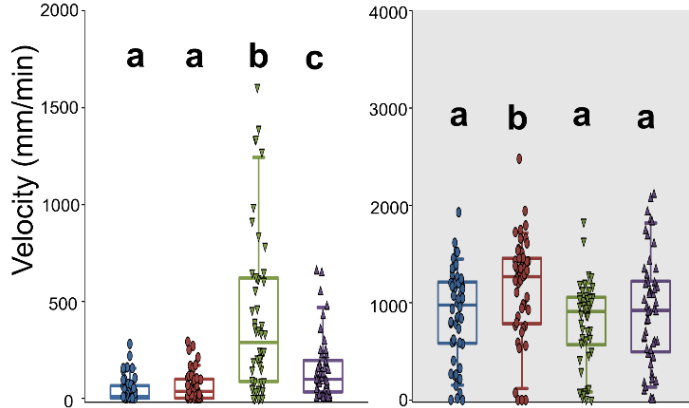

Figure S4: Impact of parental BaP exposure on offspring behavior in F2 generations. 96hpf F2 generation embryos from all four F0 crosses were assessed for photomotor behavioral responses. Distance traveled over 30 min larval photomotor response test (A, B) 10 min light acclimation, 10 min dark, 10 min light) of 96 hpf F2 zebrafish (n=50). Within light phase, hyperactivity was measured in Bm x Cf larval F1 zebrafish while in the dark phase Cm x Bf were hyperactive. Letters that are not in common are significantly different (ANOVA, SNK post-hoc  $p \leq 0.05$ ).

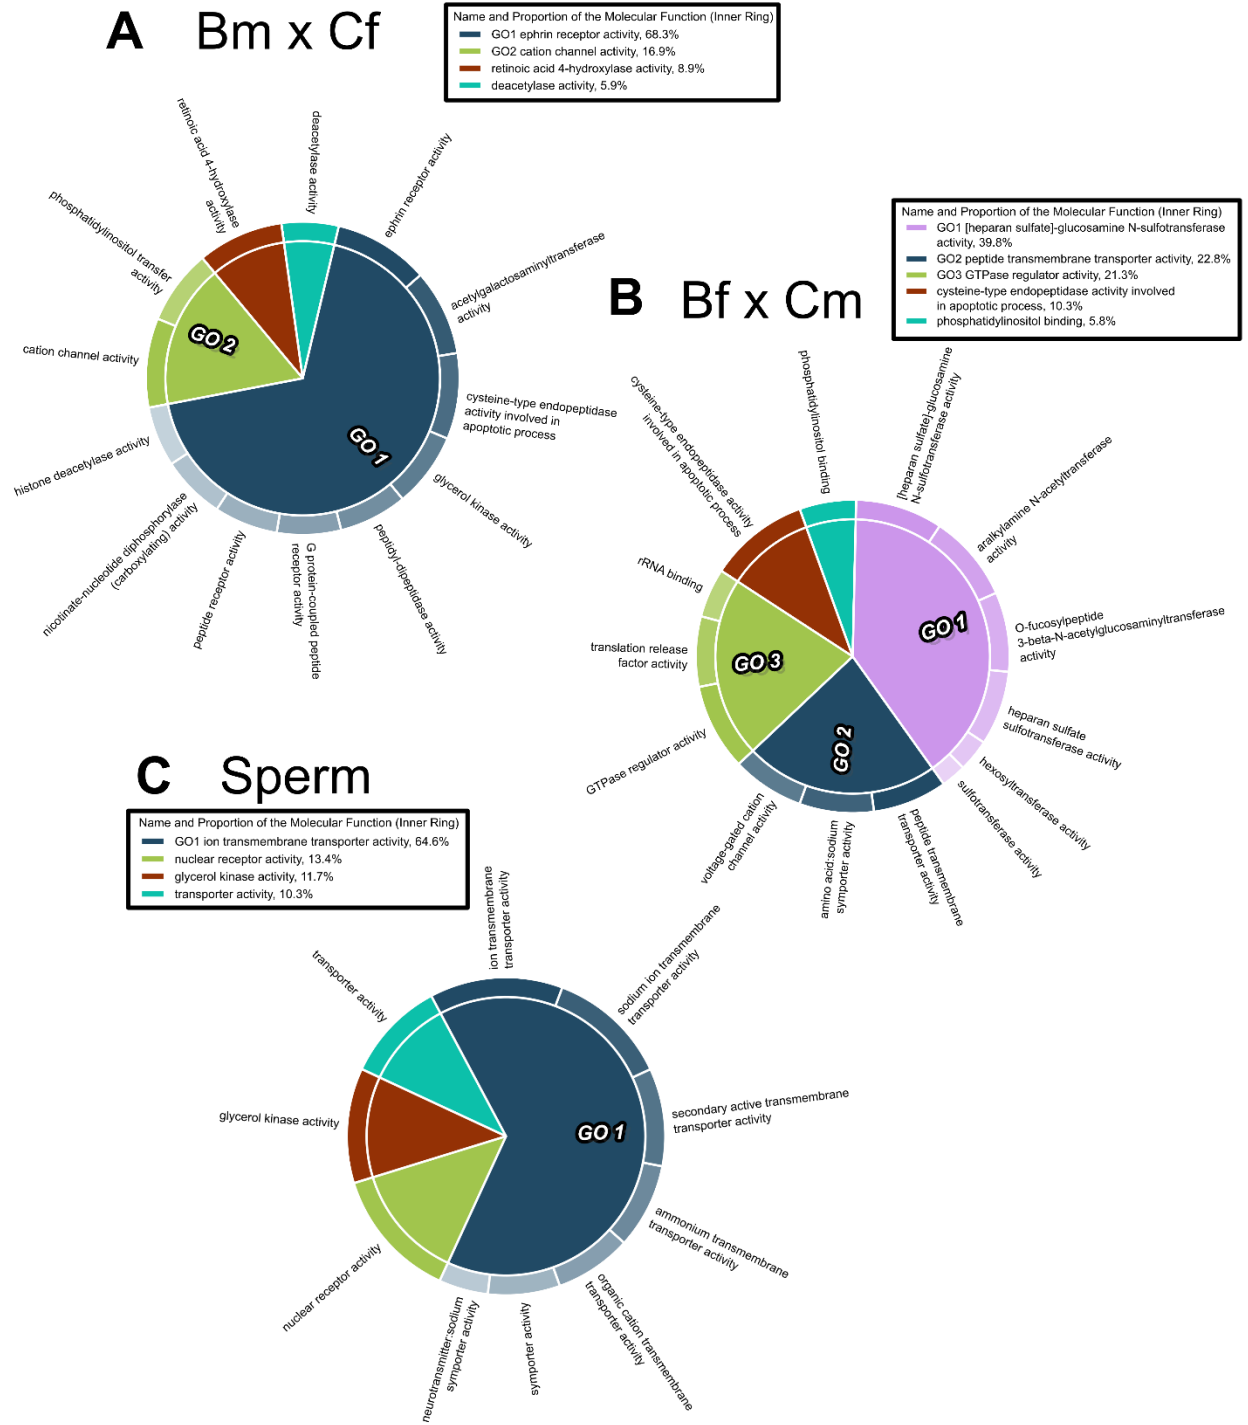

Figure S5: Gene Ontology analysis (molecular function pathways) of genes associated with DMRs in the F1 generation 10 hpf embryos from the BaP exposed and control parental crosses (Bm x Cf and Cm x Bf) and sperm from exposed males. The size of each parental GO term is determined by its statistical significance (p-value) and the different child terms under each parental GO term are represented by color gradient along the circumference of the plot.

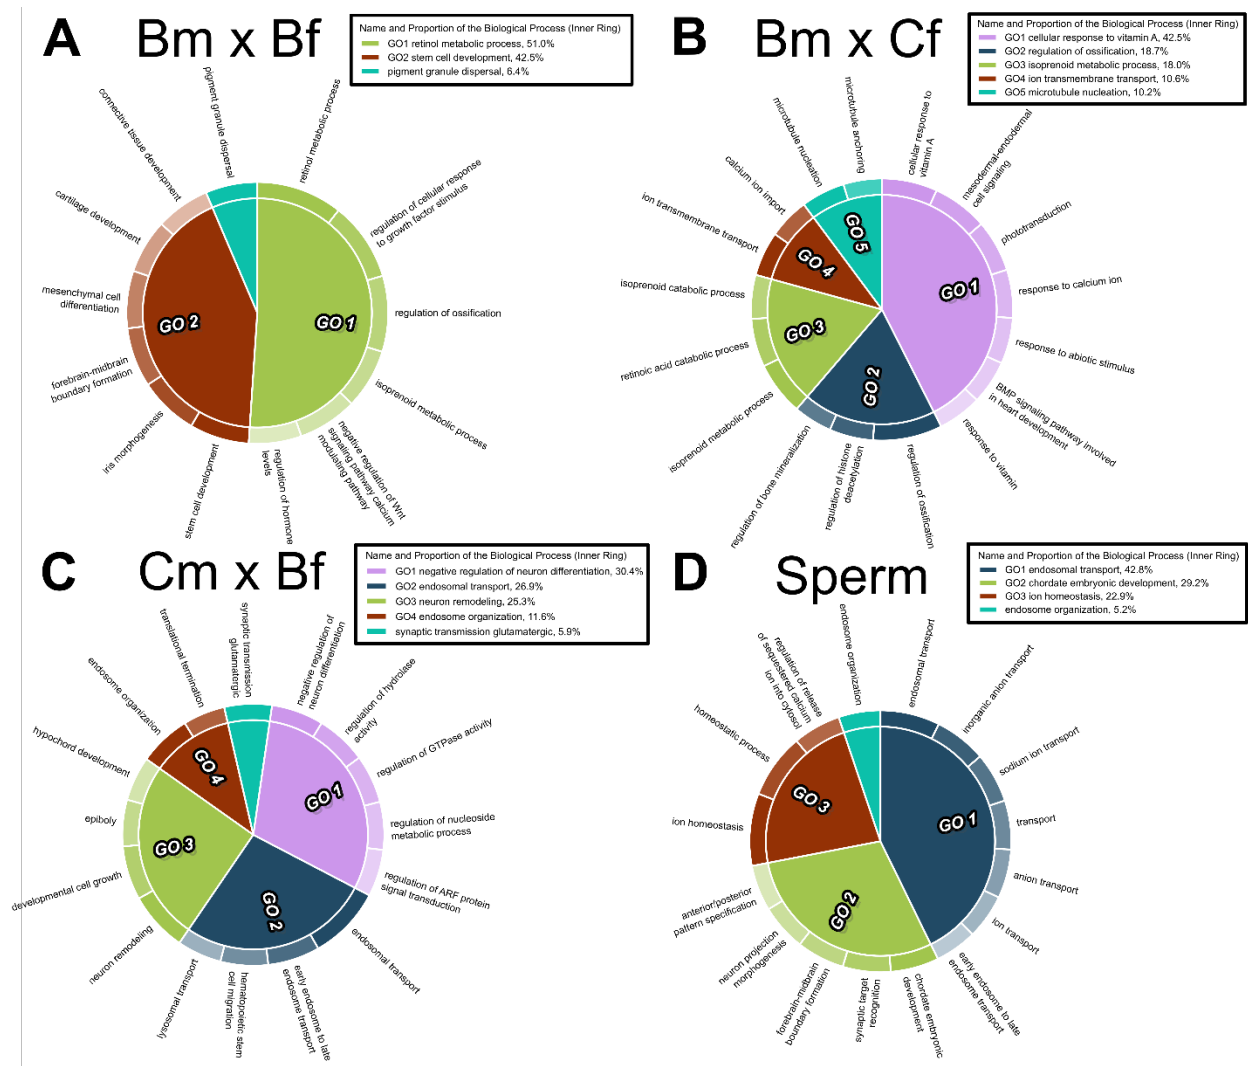

Figure S6: Gene Ontology analysis (biological function pathways) of genes associated with DMRs in the F1 generation 10 hpf embryos from the BaP exposed and control parental crosses (Bm x Cf and Cm x Bf) and sperm from exposed males. The size of each parental GO term is determined by its statistical significance (p-value) and the different child terms under each parental GO term are represented by color gradient along the circumference of the plot.



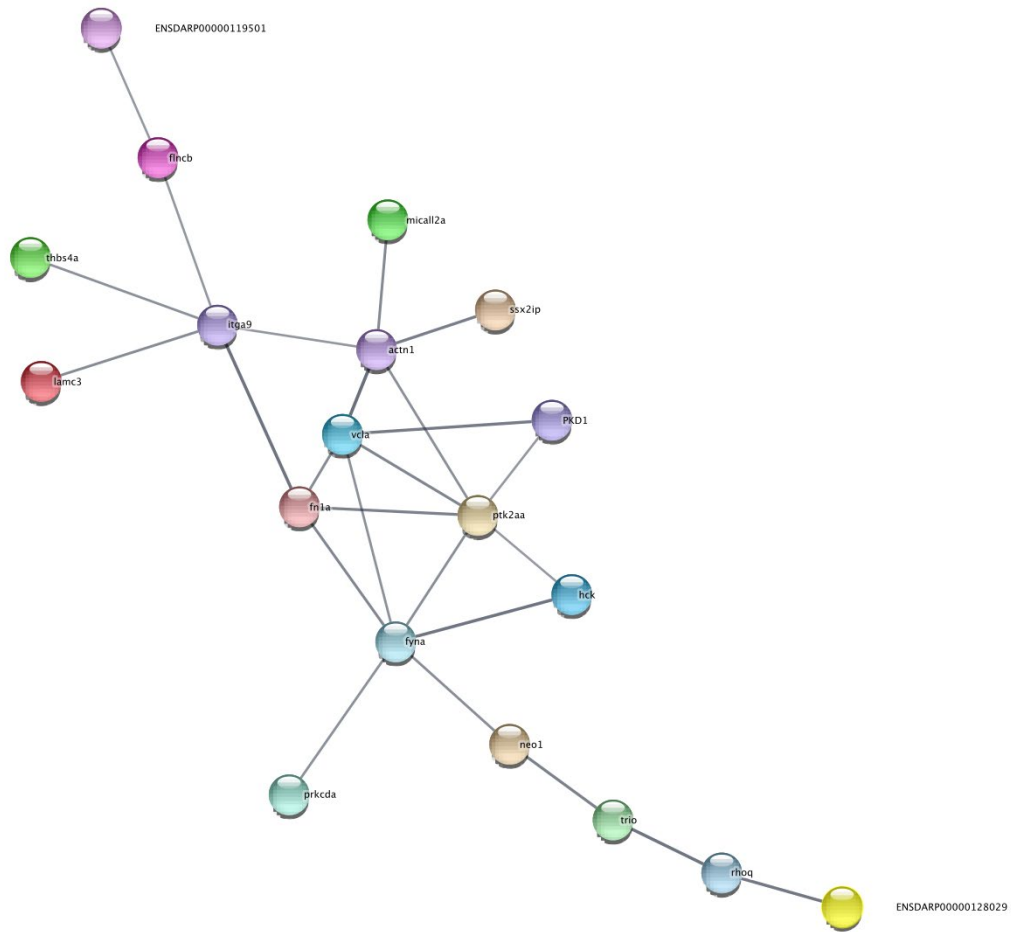

Figure S7: Protein-protein interaction network Cluster 1 from (STRING). Gene descriptions and gene stable IDs are provided in BaP\_SlXlsx. The nodes are proteins, and the links are interactions between them.

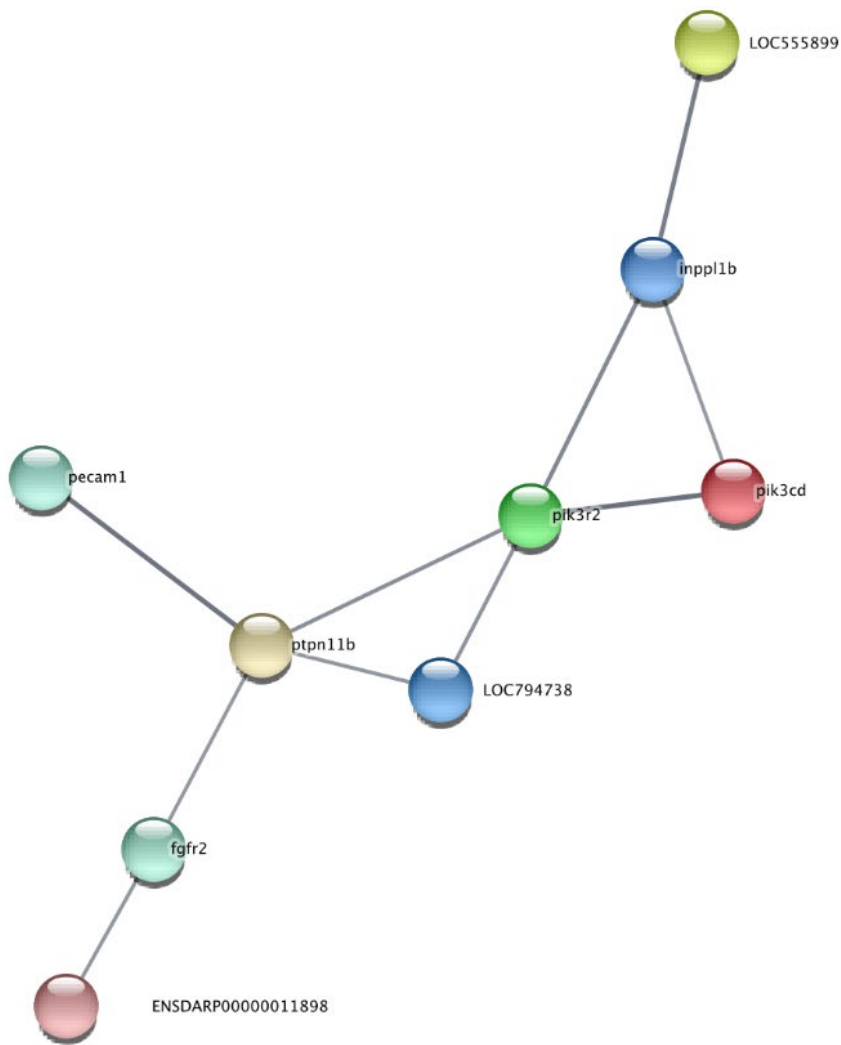

Figure S8: Protein-protein interaction network Cluster 2 from (STRING). Gene descriptions and gene stable IDs are provided in BaP\_S1xlsx. The nodes are proteins, and the links are interactions between them.

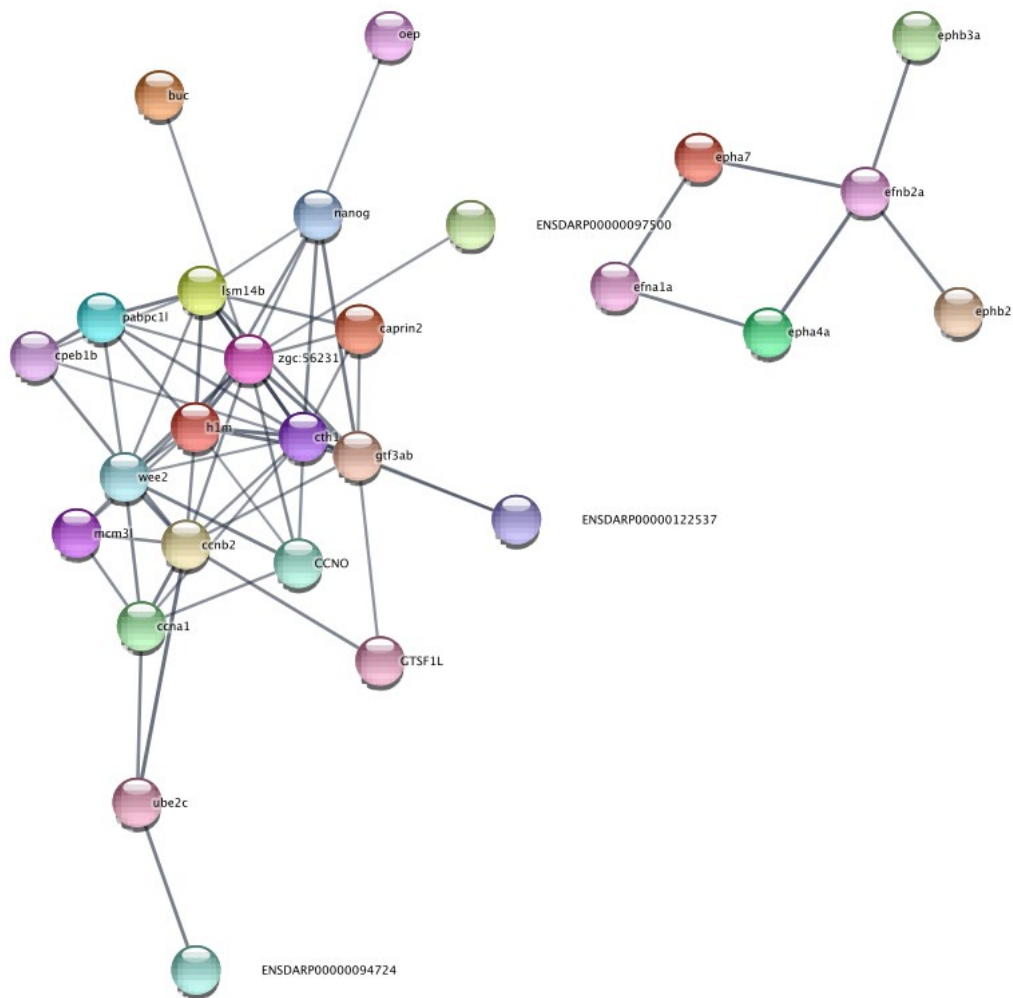

Figure S9: Protein-protein interaction network Cluster 3 from (STRING). Gene descriptions and gene stable IDs are provided in BaP\_Sixlsx. The nodes are proteins, and the links are interactions between them.
